# Supplementary material for: Exposure to PBDEs in the Office Environment: Evaluating the Relationships Between Dust, Handwipes, and Serum
Source: PubMed Central journal article supplement (PMC3230398; doi:10.1289/ehp.1003271), 2011-06-30
Supplement: ehp.1003271.s001.pdf [file ehp.1003271.s001.pdf]

## Supplemental Material

### Exposure to PBDEs in the Office Environment: Evaluating the Relationship Between Dust, Handwipes and Serum

Deborah J. Watkins, Michael D. McClean, Alicia J. Fraser, Janice Weinberg, Heather M. Stapleton, Andreas Sjödin, Thomas F. Webster

#### Contents:

|                                                                                         |    |
|-----------------------------------------------------------------------------------------|----|
| I. Supplemental Material, Text: Spearman Correlations within Sample Type                | 2  |
| II. Supplemental Material, Table 1. Correlations of PBDE congeners in office dust       | 3  |
| III. Supplemental Material, Table 2. Correlations of PBDE congeners in handwipes        | 5  |
| IV. Supplemental Material, Figure 1. Scatter plot of PBDEs in office dust vs. handwipes | 7  |
| V. Supplemental Material, Table 3. Correlations of PBDE congeners in serum              | 8  |
| VI. Supplemental Material, Figure 2. Conceptual Model of Exposure                       | 9  |
| References                                                                              | 10 |

### Supplemental Material, Text: Spearman Correlations within Sample Type

Individual PBDE congeners in handwipes were correlated in a pattern reflecting the three commercial mixtures: Penta, Octa, and Deca. Penta congeners were all highly correlated with one another as well as with the sum Penta measure ( $p < 0.0001$  for all comparisons). BDE 183 in handwipes was moderately correlated with the Penta sum measure ( $r = 0.45$ ,  $p = 0.01$ ) but BDE 209 was not ( $r = 0.16$ ,  $p = 0.39$ ). Individual PBDE congeners measured in office dust were also correlated with one another in a pattern that generally represents the three commercial PBDE mixtures. However, BDE 183 and BDE 209 were more highly correlated than expected ( $r = 0.61$ ,  $p = 0.0003$ ) based on earlier work in homes (Allen et al. 2008), suggesting a possible common source of Octa and Deca. As Octa and Deca were commonly used in acrylonitrile-butadiene-styrene (ABS) and high-impact polystyrene (HIPS) polymers, respectively, for the housings of office equipment (Birnbaum and Cohen Hubal 2006), they may often occur together in the office environment. Both BDE 183 and BDE 209 were also moderately correlated with the sum PentaBDE measurement ( $r = 0.46$ ,  $p = 0.009$  and  $r = 0.45$ ,  $p = 0.01$  respectively). Principal component analysis confirmed that PBDE congeners in both handwipes and office dust clustered by commercial mixture, consistent with our previous findings (Allen et al. 2008).

Supplemental Material, Table 1. Correlations of PBDE congeners in office dust

|                  | <b>BDE28/33</b> | <b>BDE47</b>  | <b>BDE49</b>  | <b>BDE66</b>  | <b>BDE75</b>  | <b>BDE85/155</b> | <b>BDE99</b>  | <b>BDE100</b> | <b>BDE138</b> | <b>BDE153</b>                |
|------------------|-----------------|---------------|---------------|---------------|---------------|------------------|---------------|---------------|---------------|------------------------------|
| <b>BDE28/33</b>  | 1.00            | 0.80343       | 0.50010       | 0.78527       | 0.29091       | 0.68860          | 0.75782       | 0.77639       | 0.54208       | 0.60969                      |
| <i>p-value</i>   |                 | <.0001        | 0.0042        | <.0001        | 0.1124        | <.0001           | <.0001        | <.0001        | 0.0016        | 0.0003                       |
| <b>BDE47</b>     |                 | 1.00          | 0.70202       | 0.73952       | 0.30616       | 0.80605          | 0.87137       | 0.95202       | 0.68508       | 0.71411                      |
| <i>p-value</i>   |                 |               | <.0001        | <.0001        | 0.0939        | <.0001           | <.0001        | <.0001        | <.0001        | <.0001                       |
| <b>BDE49</b>     |                 |               | 1.00          | 0.53589       | 0.30010       | 0.54234          | 0.57944       | 0.64073       | 0.53992       | 0.53145                      |
| <i>p-value</i>   |                 |               |               | 0.0019        | 0.1009        | 0.0016           | 0.0006        | 0.0001        | 0.0017        | 0.0021                       |
| <b>BDE66</b>     |                 |               |               | 1.00          | 0.39072       | 0.66935          | 0.71089       | 0.76331       | 0.58145       | 0.59637                      |
| <i>p-value</i>   |                 |               |               |               | 0.0298        | <.0001           | <.0001        | <.0001        | 0.0006        | 0.0004                       |
| <b>BDE75</b>     |                 |               |               |               | 1.00          | 0.47972          | 0.40383       | 0.32936       | 0.39617       | 0.39132                      |
| <i>p-value</i>   |                 |               |               |               |               | 0.0063           | 0.0243        | 0.0704        | 0.0274        | 0.0295                       |
| <b>BDE85/155</b> |                 |               |               |               |               | 1.00             | 0.94395       | 0.89153       | 0.90000       | 0.86935                      |
| <i>p-value</i>   |                 |               |               |               |               |                  | <.0001        | <.0001        | <.0001        | <.0001                       |
| <b>BDE99</b>     |                 |               |               |               |               |                  | 1.00          | 0.95565       | 0.84153       | 0.86855                      |
| <i>p-value</i>   |                 |               |               |               |               |                  |               | <.0001        | <.0001        | <.0001                       |
| <b>BDE100</b>    |                 |               |               |               |               |                  |               | 1.00          | 0.79597       | 0.82177                      |
| <i>p-value</i>   |                 |               |               |               |               |                  |               |               | <.0001        | <.0001                       |
| <b>BDE138</b>    |                 |               |               |               |               |                  |               |               | 1.00          | 0.97016                      |
| <i>p-value</i>   |                 |               |               |               |               |                  |               |               |               | <.0001                       |
| <b>BDE153</b>    |                 |               |               |               |               |                  |               |               |               | 1.00                         |
|                  |                 |               |               |               |               |                  |               |               |               |                              |
|                  | <b>BDE154</b>   | <b>BDE183</b> | <b>BDE196</b> | <b>BDE197</b> | <b>BDE201</b> | <b>BDE206</b>    | <b>BDE207</b> | <b>BDE208</b> | <b>BDE209</b> | <b>ΣPentaBDE<sup>a</sup></b> |
| <b>BDE28/33</b>  | 0.57154         | 0.37457       | 0.17740       | 0.16408       | 0.25227       | 0.19193          | 0.21756       | 0.22624       | 0.29001       | 0.81675                      |
| <i>p-value</i>   | 0.0008          | 0.0379        | 0.3397        | 0.3778        | 0.1710        | 0.3010           | 0.2397        | 0.2210        | 0.1135        | <.0001                       |
| <b>BDE47</b>     | 0.68266         | 0.36653       | 0.28750       | 0.19597       | 0.31694       | 0.34194          | 0.35282       | 0.34758       | 0.37339       | 0.93992                      |
| <i>p-value</i>   | <.0001          | 0.0426        | 0.1168        | 0.2907        | 0.0824        | 0.0597           | 0.0516        | 0.0554        | 0.0385        | <.0001                       |
| <b>BDE49</b>     | 0.43871         | 0.31089       | 0.20403       | 0.10363       | 0.20645       | 0.38790          | 0.36855       | 0.35484       | 0.38226       | 0.63750                      |
| <i>p-value</i>   | 0.0136          | 0.0887        | 0.2709        | 0.5791        | 0.2652        | 0.0311           | 0.0413        | 0.0501        | 0.0338        | 0.0001                       |
| <b>BDE66</b>     | 0.58145         | 0.26290       | 0.09637       | 0.07097       | 0.15363       | 0.10968          | 0.13306       | 0.09274       | 0.18710       | 0.74718                      |
| <i>p-value</i>   | 0.0006          | 0.1530        | 0.6060        | 0.7044        | 0.4093        | 0.5570           | 0.4755        | 0.6197        | 0.3135        | <.0001                       |
| <b>BDE75</b>     | 0.33764         | 0.15943       | 0.02926       | 0.03027       | 0.08254       | 0.01574          | -0.03754      | -0.06741      | 0.0121        | 0.36690                      |
| <i>p-value</i>   | 0.0632          | 0.3916        | 0.8758        | 0.8716        | 0.6589        | 0.9330           | 0.8411        | 0.7186        | 0.9948        | 0.0423                       |
| <b>BDE85/155</b> | 0.85121         | 0.41089       | 0.30524       | 0.17540       | 0.37903       | 0.36008          | 0.34960       | 0.36855       | 0.39879       | 0.92177                      |
| <i>p-value</i>   | <.0001          | 0.0217        | 0.0950        | 0.3453        | 0.0355        | 0.0466           | 0.0539        | 0.0413        | 0.0263        | <.0001                       |
| <b>BDE99</b>     | 0.84758         | 0.46048       | 0.37984       | 0.24274       | 0.44274       | 0.43629          | 0.41411       | 0.42218       | 0.45242       | 0.97661                      |
| <i>p-value</i>   | <.0001          | 0.009         | 0.0351        | 0.1883        | 0.0126        | 0.0141           | 0.0206        | 0.0180        | 0.0106        | <.0001                       |

| <b>Table S1. Correlations of PBDE congeners in office dust (cont.)</b> |               |               |               |               |               |               |               |               |               |                              |
|------------------------------------------------------------------------|---------------|---------------|---------------|---------------|---------------|---------------|---------------|---------------|---------------|------------------------------|
|                                                                        | <b>BDE154</b> | <b>BDE183</b> | <b>BDE196</b> | <b>BDE197</b> | <b>BDE201</b> | <b>BDE206</b> | <b>BDE207</b> | <b>BDE208</b> | <b>BDE209</b> | <b>ΣPentaBDE<sup>a</sup></b> |
| <b>BDE100</b>                                                          | 0.79355       | 0.45968       | 0.36734       | 0.27540       | 0.41976       | 0.40726       | 0.40565       | 0.39677       | 0.43105       | 0.98145                      |
| <i>p-value</i>                                                         | <.0001        | 0.0093        | 0.0421        | 0.1337        | 0.0187        | 0.0230        | 0.0236        | 0.0271        | 0.0155        | <.0001                       |
| <b>BDE138</b>                                                          | 0.86411       | 0.59597       | 0.49315       | 0.35202       | 0.51169       | 0.47218       | 0.47500       | 0.46532       | 0.49113       | 0.81532                      |
| <i>p-value</i>                                                         | <.0001        | 0.0004        | 0.0048        | 0.0521        | 0.0033        | 0.0073        | 0.0069        | 0.0083        | 0.0050        | <.0001                       |
| <b>BDE153</b>                                                          | 0.88750       | 0.67782       | 0.57984       | 0.44194       | 0.58306       | 0.48226       | 0.50202       | 0.47661       | 0.51008       | 0.84556                      |
| <i>p-value</i>                                                         | <.0001        | <.0001        | 0.0006        | 0.0128        | 0.0006        | 0.0060        | 0.0040        | 0.0067        | 0.0034        | <.0001                       |
|                                                                        | <b>BDE154</b> | <b>BDE183</b> | <b>BDE196</b> | <b>BDE197</b> | <b>BDE201</b> | <b>BDE206</b> | <b>BDE207</b> | <b>BDE208</b> | <b>BDE209</b> | <b>ΣPentaBDE<sup>a</sup></b> |
| <b>BDE154</b>                                                          | 1.00          | 0.48508       | 0.48589       | 0.27702       | 0.44556       | 0.41492       | 0.44274       | 0.42984       | 0.47097       | 0.80806                      |
| <i>p-value</i>                                                         |               | 0.0057        | 0.0056        | 0.1314        | 0.0120        | 0.0203        | 0.0126        | 0.0158        | 0.0075        | <.0001                       |
| <b>BDE183</b>                                                          |               | 1.00          | 0.82782       | 0.92621       | 0.76613       | 0.57944       | 0.64435       | 0.57097       | 0.60847       | 0.46008                      |
| <i>p-value</i>                                                         |               |               | <.0001        | <.0001        | <.0001        | <.0001        | <.0001        | 0.0008        | 0.0003        | 0.0092                       |
| <b>BDE196</b>                                                          |               |               | 1.00          | 0.83911       | 0.82419       | 0.70806       | 0.76613       | 0.68065       | 0.71048       | 0.55806                      |
| <i>p-value</i>                                                         |               |               |               | <.0001        | <.0001        | <.0001        | <.0001        | <.0001        | <.0001        | 0.0011                       |
| <b>BDE197</b>                                                          |               |               |               | 1.00          | 0.76331       | 0.54677       | 0.61694       | 0.52661       | 0.56774       | 0.32298                      |
| <i>p-value</i>                                                         |               |               |               |               | <.0001        | 0.0015        | 0.0002        | 0.0023        | 0.0009        | 0.0764                       |
| <b>BDE201</b>                                                          |               |               |               |               | 1.00          | 0.77782       | 0.83629       | 0.81290       | 0.79597       | 0.26411                      |
| <i>p-value</i>                                                         |               |               |               |               |               | <.0001        | <.0001        | <.0001        | <.0001        | 0.1511                       |
| <b>BDE206</b>                                                          |               |               |               |               |               | 1.00          | 0.95968       | 0.95202       | 0.96978       | 0.42056                      |
| <i>p-value</i>                                                         |               |               |               |               |               |               | <.0001        | <.0001        | <.0001        | 0.0185                       |
| <b>BDE207</b>                                                          |               |               |               |               |               |               | 1.00          | 0.97984       | 0.97218       | 0.41331                      |
| <i>p-value</i>                                                         |               |               |               |               |               |               |               | <.0001        | <.0001        | 0.0208                       |
| <b>BDE208</b>                                                          |               |               |               |               |               |               |               | 1.00          | 0.96250       | 0.41169                      |
| <i>p-value</i>                                                         |               |               |               |               |               |               |               |               | <.0001        | 0.0214                       |
| <b>BDE209</b>                                                          |               |               |               |               |               |               |               |               | 1.00          | 0.44960                      |
| <i>p-value</i>                                                         |               |               |               |               |               |               |               |               |               | 0.0112                       |
| <b>ΣPentaBDE<sup>a</sup></b>                                           |               |               |               |               |               |               |               |               |               | 1.00                         |

<sup>a</sup>ΣPentaBDE comprises BDE28/33, 47, 99, 100, and 153 (congeners detected in >50% of samples within all three media: dust, handwipes, and serum).

Supplemental Material, Table 2. Correlations of PBDE congeners in handwipes

|                  |                 |               |               |               |               |                  |               |                              |               |
|------------------|-----------------|---------------|---------------|---------------|---------------|------------------|---------------|------------------------------|---------------|
|                  | <b>BDE28/33</b> | <b>BDE47</b>  | <b>BDE49</b>  | <b>BDE66</b>  | <b>BDE75</b>  | <b>BDE85/155</b> | <b>BDE99</b>  | <b>BDE100</b>                | <b>BDE138</b> |
| <b>BDE28/33</b>  | 1.00            | 0.77022       | 0.72254       | 0.77362       | 0.41329       | 0.61467          | 0.72019       | 0.73008                      | 0.66569       |
| <i>p-value</i>   |                 | <.0001        | <.0001        | <.0001        | 0.0208        | 0.0002           | <.0001        | <.0001                       | <.0001        |
| <b>BDE47</b>     |                 | 1.00          | 0.82482       | 0.85152       | 0.58323       | 0.80851          | 0.93427       | 0.95323                      | 0.88435       |
| <i>p-value</i>   |                 |               | <.0001        | <.0001        | 0.0006        | <.0001           | <.0001        | <.0001                       | <.0001        |
| <b>BDE49</b>     |                 |               | 1.00          | 0.90741       | 0.55525       | 0.69517          | 0.81514       | 0.82220                      | 0.76785       |
| <i>p-value</i>   |                 |               |               | <.0001        | 0.0012        | <.0001           | <.0001        | <.0001                       | <.0001        |
| <b>BDE66</b>     |                 |               |               | 1.00          | 0.52800       | 0.77772          | 0.88420       | 0.88541                      | 0.83006       |
| <i>p-value</i>   |                 |               |               |               | 0.0023        | <.0001           | <.0001        | <.0001                       | <.0001        |
| <b>BDE75</b>     |                 |               |               |               | 1.00          | 0.59869          | 0.70849       | 0.67571                      | 0.71821       |
| <i>p-value</i>   |                 |               |               |               |               | 0.0004           | <.0001        | <.0001                       | <.0001        |
| <b>BDE85/155</b> |                 |               |               |               |               | 1.00             | 0.89624       | 0.88918                      | 0.85099       |
| <i>p-value</i>   |                 |               |               |               |               |                  | <.0001        | <.0001                       | <.0001        |
| <b>BDE99</b>     |                 |               |               |               |               |                  | 1.00          | 0.99476                      | 0.95970       |
| <i>p-value</i>   |                 |               |               |               |               |                  |               | <.0001                       | <.0001        |
| <b>BDE100</b>    |                 |               |               |               |               |                  |               | 1.00                         | 0.95444       |
| <i>p-value</i>   |                 |               |               |               |               |                  |               |                              | <.0001        |
| <b>BDE138</b>    |                 |               |               |               |               |                  |               |                              | 1.00          |
|                  |                 |               |               |               |               |                  |               |                              |               |
|                  | <b>BDE153</b>   | <b>BDE154</b> | <b>BDE183</b> | <b>BDE197</b> | <b>BDE207</b> | <b>BDE208</b>    | <b>BDE209</b> | <b>ΣPentaBDE<sup>a</sup></b> |               |
| <b>BDE28/33</b>  | 0.67736         | 0.69971       | 0.47983       | 0.30411       | 0.01928       | -0.07048         | 0.05629       | 0.75368                      |               |
| <i>p-value</i>   | <.0001          | <.0001        | 0.0063        | 0.0963        | 0.9180        | 0.7064           | 0.7636        | <.0001                       |               |
| <b>BDE47</b>     | 0.90583         | 0.91395       | 0.45832       | 0.21118       | 0.11059       | 0.00899          | 0.12844       | 0.97702                      |               |
| <i>p-value</i>   | <.0001          | <.0001        | 0.0095        | 0.2541        | 0.5537        | 0.9617           | 0.4911        | <.0001                       |               |
| <b>BDE49</b>     | 0.79279         | 0.79754       | 0.34267       | 0.20432       | -0.07673      | -0.15965         | -0.10879      | 0.83169                      |               |
| <i>p-value</i>   | <.0001          | <.0001        | 0.0591        | 0.2702        | 0.6816        | 0.3909           | 0.5602        | <.0001                       |               |
| <b>BDE66</b>     | 0.86007         | 0.86202       | 0.40138       | 0.22138       | -0.05596      | -0.14438         | -0.02118      | 0.87291                      |               |
| <i>p-value</i>   | <.0001          | <.0001        | 0.0252        | 0.2314        | 0.7650        | 0.4384           | 0.9099        | <.0001                       |               |
| <b>BDE75</b>     | 0.70327         | 0.69350       | 0.32901       | 0.28711       | 0.26363       | 0.15859          | 0.38140       | 0.66883                      |               |
| <i>p-value</i>   | <.0001          | <.0001        | 0.0707        | 0.1173        | 0.1519        | 0.3942           | 0.0343        | <.0001                       |               |
| <b>BDE85/155</b> | 0.87837         | 0.88426       | 0.30443       | 0.11783       | 0.02430       | 0.10804          | 0.12555       | 0.86942                      |               |
| <i>p-value</i>   | <.0001          | <.0001        | 0.0959        | 0.5278        | 0.8967        | 0.5629           | 0.5009        | <.0001                       |               |
| <b>BDE99</b>     | 0.99072         | 0.99082       | 0.44943       | 0.25081       | 0.09006       | -0.00300         | 0.19236       | 0.98387                      |               |
| <i>p-value</i>   | <.0001          | <.0001        | 0.0112        | 0.1735        | 0.6299        | 0.9872           | 0.2999        | <.0001                       |               |
| <b>BDE100</b>    | 0.98185         | 0.98315       | 0.45347       | 0.23988       | 0.08336       | -0.00621         | 0.15687       | 0.99153                      |               |
| <i>p-value</i>   | <.0001          | <.0001        | 0.0104        | 0.1937        | 0.6557        | 0.9736           | 0.3994        | <.0001                       |               |

| <b>Table S2. Correlations of PBDE congeners in handwipes (cont.)</b> |               |               |               |               |               |               |               |                              |
|----------------------------------------------------------------------|---------------|---------------|---------------|---------------|---------------|---------------|---------------|------------------------------|
|                                                                      | <b>BDE153</b> | <b>BDE154</b> | <b>BDE183</b> | <b>BDE197</b> | <b>BDE207</b> | <b>BDE208</b> | <b>BDE209</b> | <b>ΣPentaBDE<sup>a</sup></b> |
| <b>BDE138</b>                                                        | 0.96294       | 0.95815       | 0.38869       | 0.17742       | 0.05976       | -0.04355      | 0.18232       | 0.94249                      |
| <i>p-value</i>                                                       | <.0001        | <.0001        | 0.0307        | 0.3397        | 0.7495        | 0.8160        | 0.3263        | <.0001                       |
| <b>BDE153</b>                                                        | 1.00          | 0.99627       | 0.45063       | 0.27903       | 0.08170       | -0.02559      | 0.17868       | 0.96653                      |
| <i>p-value</i>                                                       |               | <.0001        | 0.0110        | 0.1285        | 0.6622        | 0.8913        | 0.3362        | <.0001                       |
| <b>BDE154</b>                                                        |               | 1.00          | 0.43721       | 0.26234       | 0.05973       | -0.04520      | 0.17322       | 0.96863                      |
| <i>p-value</i>                                                       |               |               | 0.0139        | 0.1539        | 0.7496        | 0.8092        | 0.3514        | <.0001                       |
| <b>BDE183</b>                                                        |               |               | 1.00          | 0.58038       | 0.64386       | 0.45749       | 0.38834       | 0.45186                      |
| <i>p-value</i>                                                       |               |               |               | 0.0006        | <.0001        | 0.0097        | 0.0309        | 0.0107                       |
| <b>BDE197</b>                                                        |               |               |               | 1.00          | 0.40807       | 0.26564       | 0.24098       | 0.24609                      |
| <i>p-value</i>                                                       |               |               |               |               | 0.0227        | 0.1487        | 0.1916        | 0.1820                       |
| <b>BDE207</b>                                                        |               |               |               |               | 1.00          | 0.88315       | 0.59111       | 0.10095                      |
| <i>p-value</i>                                                       |               |               |               |               |               | <.0001        | 0.0005        | 0.5889                       |
| <b>BDE208</b>                                                        |               |               |               |               |               | 1.00          | 0.44812       | 0.01135                      |
| <i>p-value</i>                                                       |               |               |               |               |               |               | 0.0115        | 0.9517                       |
| <b>BDE209</b>                                                        |               |               |               |               |               |               | 1.00          | 0.15828                      |
| <i>p-value</i>                                                       |               |               |               |               |               |               |               | 0.3951                       |
| <b>ΣPentaBDE<sup>a</sup></b>                                         |               |               |               |               |               |               |               | 1.00                         |

<sup>a</sup>ΣPentaBDE comprises BDE28/33, 47, 99, 100, and 153 (congeners detected in >50% of samples within all three media: dust, handwipes, and serum)

Supplemental Material, Figure 1. Scatter plot of PBDEs in office dust vs. handwipes (n=31)

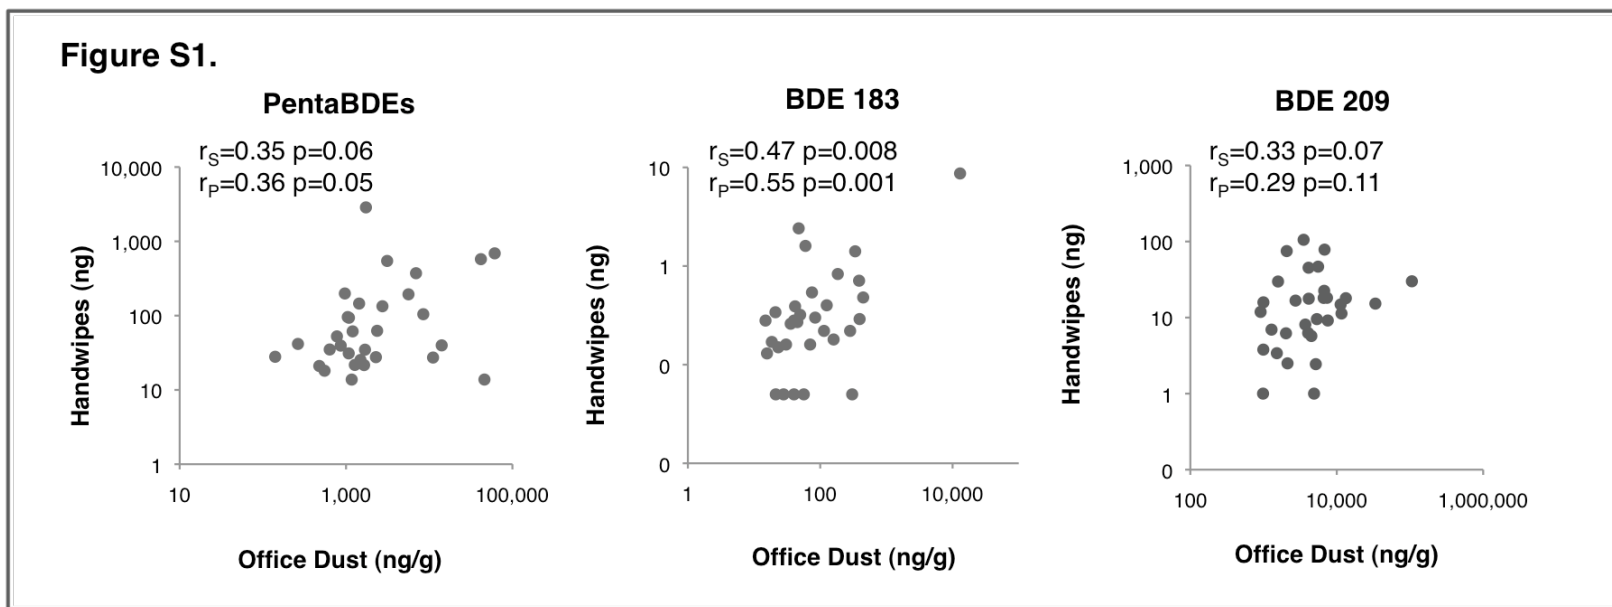

$r_S$  =Spearman Correlation Coefficient;  $r_P$  =Pearson Correlation Coefficient of natural log-transformed data

Supplemental Material, Table 3. Correlations of PBDE congeners in serum

|                              | <b>BDE28</b> | <b>BDE47</b> | <b>BDE99</b> | <b>BDE100</b> | <b>BDE153</b> | <b>BDE209</b> | <b>ΣPentaBDE<sup>a</sup></b> |
|------------------------------|--------------|--------------|--------------|---------------|---------------|---------------|------------------------------|
| <b>BDE28</b>                 | 1.00         | 0.89412      | 0.75485      | 0.83517       | 0.75945       | -0.05595      | 0.87614                      |
| <i>p-value</i>               |              | <.0001       | <.0001       | <.0001        | <.0001        | 0.7690        | <.0001                       |
| <b>BDE47</b>                 |              | 1.00         | 0.91340      | 0.96863       | 0.73807       | -0.03834      | 0.96729                      |
| <i>p-value</i>               |              |              | <.0001       | <.0001        | <.0001        | 0.8406        | <.0001                       |
| <b>BDE99</b>                 |              |              | 1.00         | 0.94365       | 0.76222       | -0.02376      | 0.92563                      |
| <i>p-value</i>               |              |              |              | <.0001        | <.0001        | 0.9008        | <.0001                       |
| <b>BDE100</b>                |              |              |              | 1.00          | 0.80303       | 0.02755       | 0.97529                      |
| <i>p-value</i>               |              |              |              |               | <.0001        | 0.8851        | <.0001                       |
| <b>BDE153</b>                |              |              |              |               | 1.00          | -0.02308      | 0.85562                      |
| <i>p-value</i>               |              |              |              |               |               | 0.9036        | <.0001                       |
| <b>BDE209</b>                |              |              |              |               |               | 1.00          | -0.02074                     |
| <i>p-value</i>               |              |              |              |               |               |               | 0.9134                       |
| <b>ΣPentaBDE<sup>a</sup></b> |              |              |              |               |               |               | 1.00                         |

<sup>a</sup>ΣPentaBDE comprises BDE28/33, 47, 99, 100, and 153 (congeners detected in >50% of samples within all three media: dust, handwipes, and serum)



Supplemental Material, Figure 2. Conceptual Model of Exposure

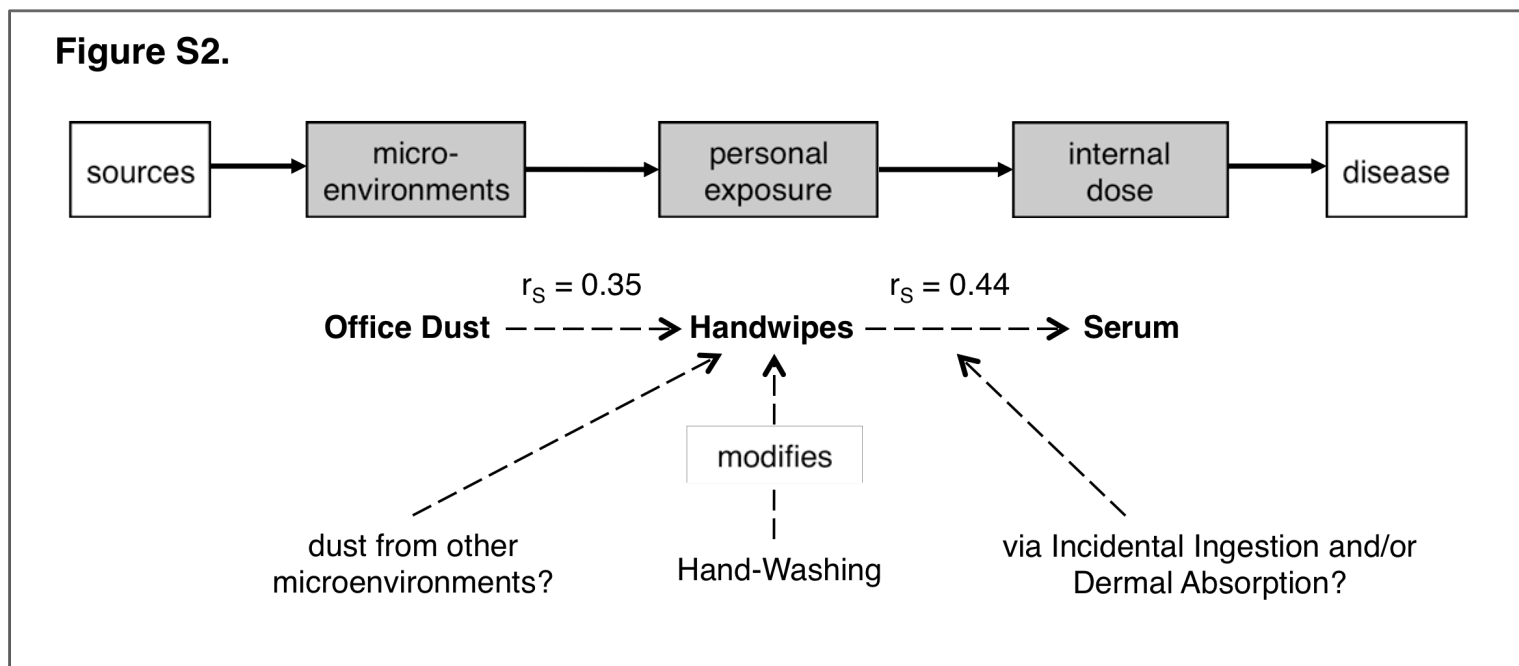

Office dust is a measure of PBDEs in the microenvironment, handwipes a measure of personal exposure, and serum a measure of internal dose.  $r_s$  =Spearman Correlation Coefficient

## References

Allen JG, McClean MD, Stapleton HM, Webster TF. 2008. Critical factors in assessing exposure to PBDEs via house dust. *Environ Int* 34(8):1085-1091.

Birnbaum LS, Cohen Hubal EA. 2006. Polybrominated diphenyl ethers: A case study for using biomonitoring data to address risk assessment questions. *Environ Health Perspect* 114(11):1770-1775.
